# Supplementary material for: Catalytic NH3 oxidation affected by the nanometric roughness of the platinum overlayer
Source: Royal Society of Chemistry journal article supplement (doi:10.1039/d4nr01156b), 2024-01-01
Supplement: d4nr01156b1.pdf [file d4nr01156b1.pdf]

Electronic Supplementary Information

Catalytic NH<sub>3</sub> Oxidation Affected by the Nanometric Roughness of the  
Platinum Overlayer

Masato Machida,<sup>\*,#,1</sup> Nayu Yamasaki,<sup>†</sup> Tomoya Miyoshi,<sup>†</sup> Hiroki Kusaba,<sup>†</sup> Tetsuya Sato,<sup>‡</sup> Keisuke  
Awaya,<sup>#</sup> Hiroshi Yoshida,<sup>#</sup> Junya Ohyama,<sup>#,1</sup> Teppei Ohori,<sup>§</sup> Kohei Oka,<sup>§</sup> Kenji Fujii,<sup>§</sup> Naoya  
Ishikawa<sup>§</sup>

<sup>#</sup> Division of Materials Science and Chemistry, Faculty of Advanced Science and Technology,  
Kumamoto University, 2-39-1 Kurokami, Chuo, Kumamoto 860-8555, Japan

<sup>1</sup> Institute of Industrial Nanomaterials, Kumamoto University, 2-39-1 Kurokami, Chuo,  
Kumamoto 860-8555, Japan

<sup>†</sup> Department of Applied Chemistry and Biochemistry, Graduate School of Science and  
Technology, Kumamoto University, 2-39-1 Kurokami, Chuo, Kumamoto, 860-8555, Japan

<sup>‡</sup> Technical Division, Faculty of Engineering, Kumamoto University, 2-39-1 Kurokami, Chuo,  
Kumamoto, 860-8555, Japan

<sup>§</sup> Isuzu Advanced Engineering Center, Ltd, 8 Tsuchidana, Fujisawa, 252-0881, Japan

\* E-mail: machida@kumamoto-u.ac.jp

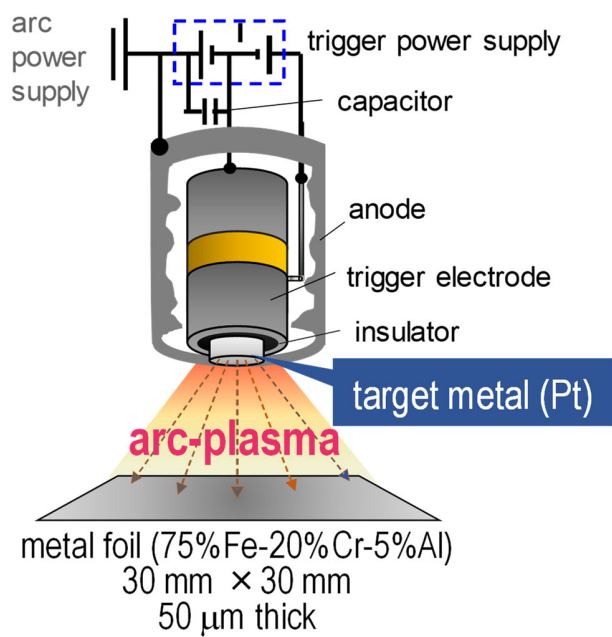

**Figure S1.** Schematic of the pulsed AP deposition of Pt on a Fe–Cr–Al foil. This figure is reproduced from a reference.<sup>1</sup>

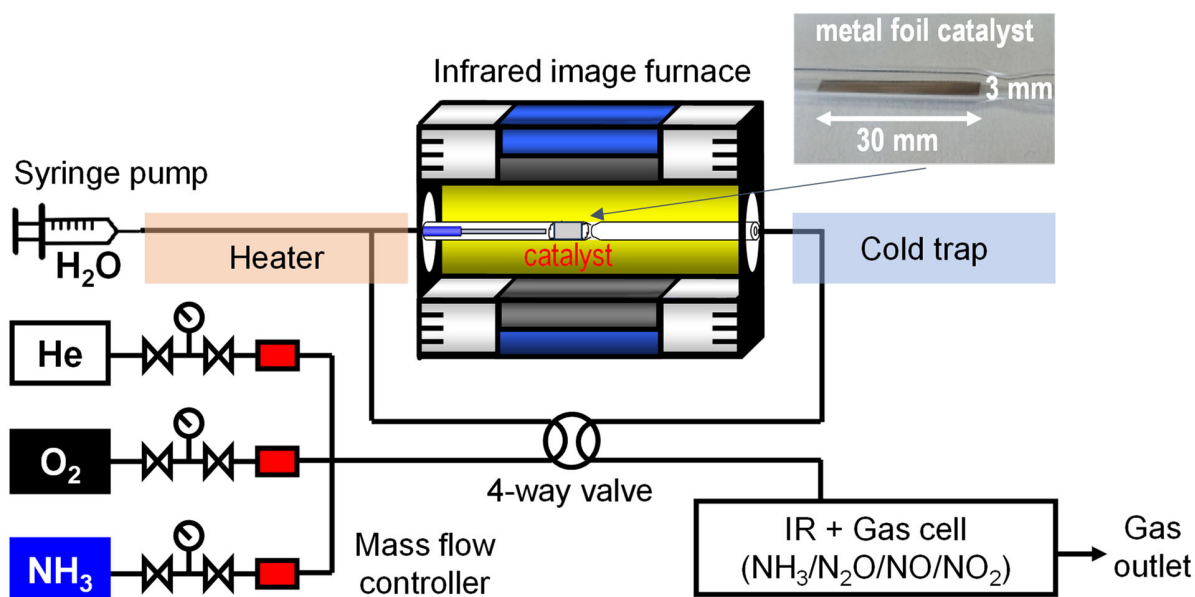

**Figure S2.** A schematic illustration of catalytic reaction experiments and gas analysis. This figure is reproduced from references.<sup>2,3</sup>

The catalytic NH<sub>3</sub> oxidation was conducted in a flow reactor comprising a gas-supplying system equipped with mass flow controllers, a water-supplying pump, a quartz tube reactor (6 mm in outer diameter and 4 mm in inner diameter), a water-cooled infrared image furnace (RHL-E25P, Ulvac Riko, Japan) and a cooling trap. A strip foil (3 × 30 mm<sup>2</sup>) of an as-prepared film catalyst (coated on one side only) was set in a catalytic activity test tube. A simulated gas mixture comprising 300 ppm NH<sub>3</sub>, 8% O<sub>2</sub>, 10% H<sub>2</sub>O and a He balance was supplied at a flow rate of 100 mL min<sup>-1</sup>. Concentrations of NH<sub>3</sub>, NO, N<sub>2</sub>O and NO<sub>2</sub> were monitored using an online Fourier-transform infrared spectrometer (Nicolet iS50, Thermo Fisher Scientific, USA) equipped with a temperature-controllable gas cell (2 m optical path length) maintained at 120°C.

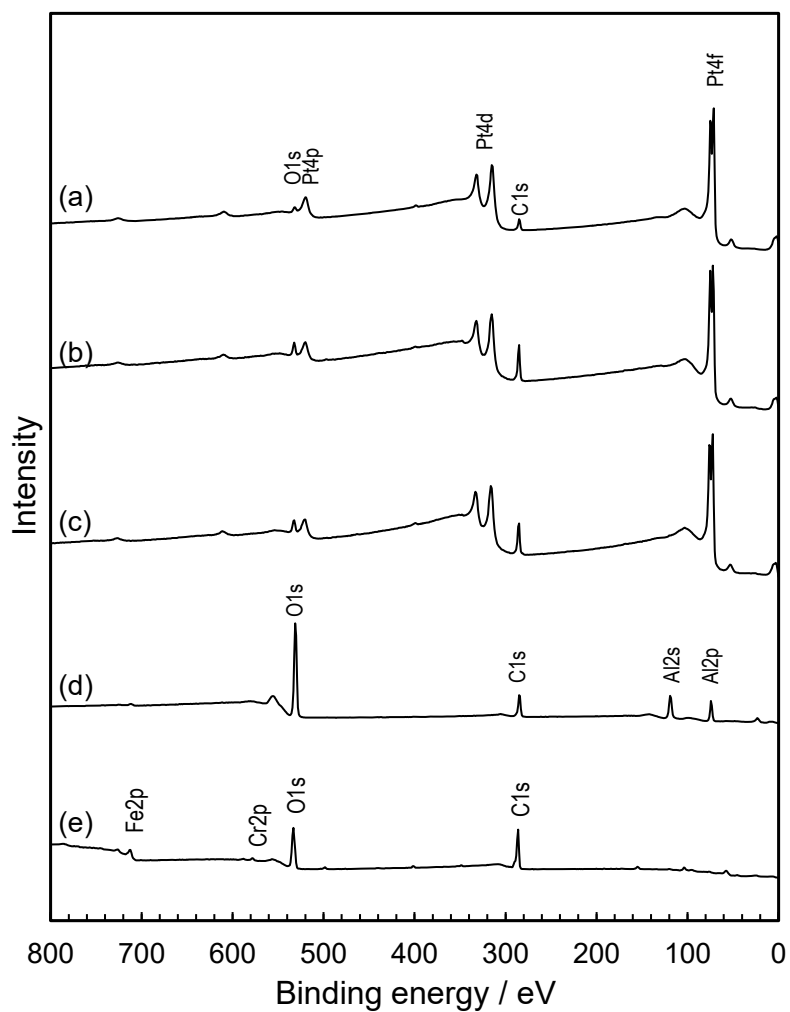

**Figure S3.** XPS Survey spectra of (a) Pt/p-SUS, (b) Pt/SUS, (c) Pt/Al<sub>2</sub>O<sub>3</sub>/SUS, (d) Al<sub>2</sub>O<sub>3</sub>/SUS, and (e) SUS. Pt was coated on SUS foils using 2,000-shot AP pulses.

The XPS data revealed that peaks assignable to the SUS components (Fe, Cr, and Al) disappeared almost completely after 2,000 shots of AP deposition, suggesting full coverage of the metal foil surface by a nanometric Pt overlayer.

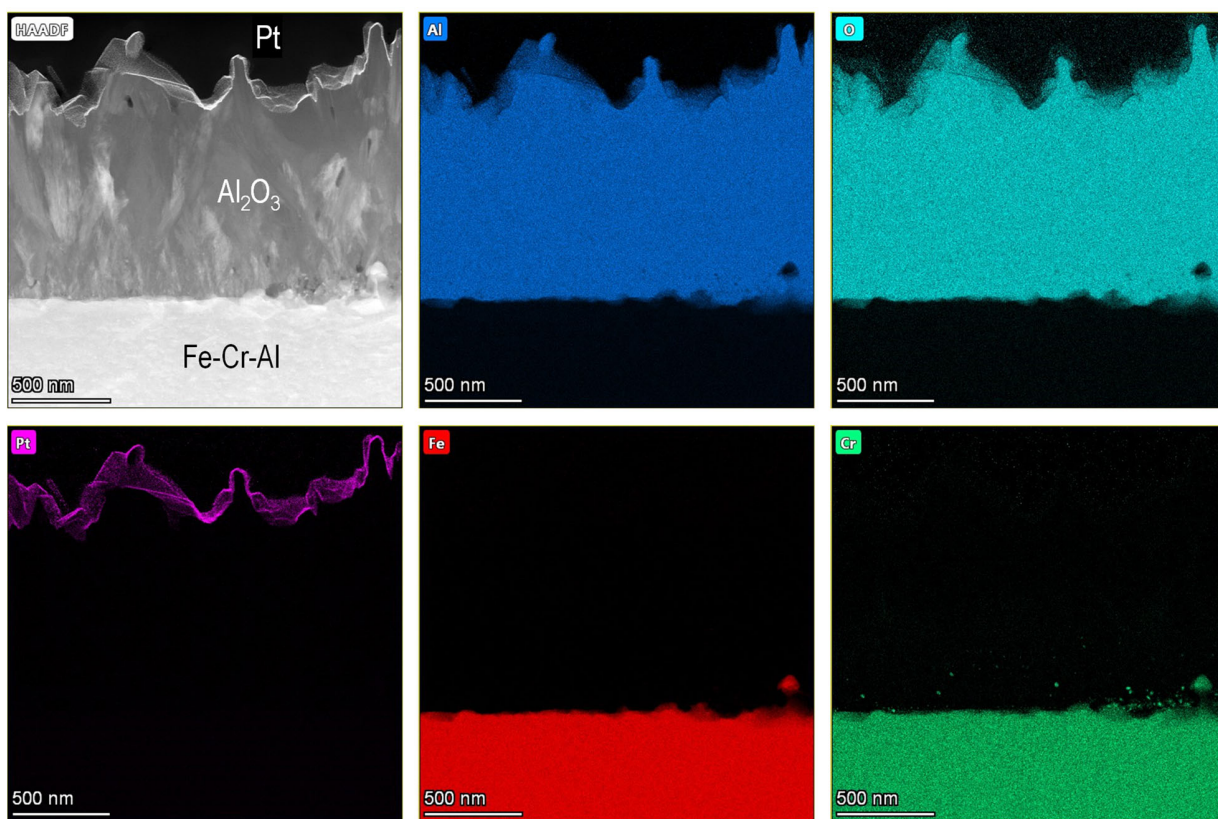

**Figure S4.** HAADF-STEM and X-ray images of cross-sectional Pt/Al<sub>2</sub>O<sub>3</sub>/SUS foil catalyst.

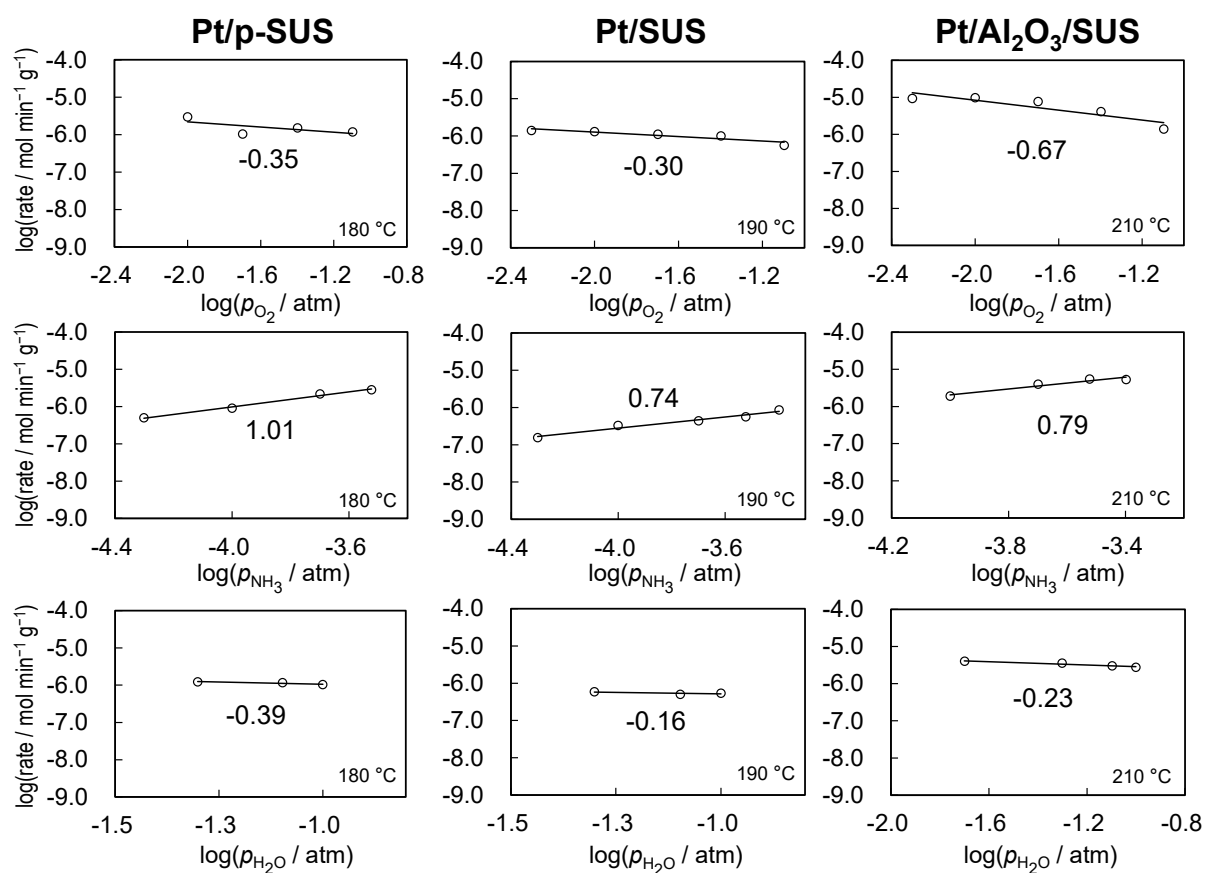

**Figure S5.** Dependence of  $\text{NH}_3$  oxidation rate on partial pressures of  $\text{O}_2$ ,  $\text{NH}_3$ , and  $\text{H}_2\text{O}$  for Pt/p-SUS (180°C), Pt/SUS (190°C) and Pt/ $\text{Al}_2\text{O}_3$ /SUS (210°C)

**Table S1** Activity comparison between Pt/p-SUS, Pt/SUS and Pt/Al<sub>2</sub>O<sub>3</sub>/SUS for NH<sub>3</sub> oxidation

| Catalyst (strip size)                                            | Pt surface area <sup>a</sup> (m <sup>2</sup> ) | Surface Pt (μmol)                    | NH <sub>3</sub> conv. <sup>d</sup> (%) | Reaction rate (μmol min <sup>-1</sup> ) | TOF <sup>e</sup> (min <sup>-1</sup> ) |
|------------------------------------------------------------------|------------------------------------------------|--------------------------------------|----------------------------------------|-----------------------------------------|---------------------------------------|
| Pt/p-SUS (3 × 10 mm <sup>2</sup> )                               | 3.0 × 10 <sup>-5</sup>                         | 7.67 × 10 <sup>-4</sup> <sup>b</sup> | 15.3                                   | 0.205                                   | 267                                   |
| Pt/SUS (3 × 30 mm <sup>2</sup> )                                 | 9.1 × 10 <sup>-5</sup>                         | 2.33 × 10 <sup>-3</sup> <sup>b</sup> | 18.7                                   | 0.250                                   | 107                                   |
| Pt/Al <sub>2</sub> O <sub>3</sub> /SUS (3 × 30 mm <sup>2</sup> ) | 14.4 × 10 <sup>-5</sup>                        | 3.69 × 10 <sup>-3</sup> <sup>b</sup> | 6.2                                    | 0.083                                   | 22                                    |
|                                                                  |                                                | 1.12 × 10 <sup>-2</sup> <sup>c</sup> | 6.2                                    | 0.083                                   | 7                                     |

<sup>a</sup> Determined by a confocal laser scanning microscope.

<sup>b</sup> Determined by the geometric area of the foil surface, surface coverage (100%), *Sdr* and surface atomic density of Pt (1.54 × 10<sup>19</sup> atom m<sup>-2</sup>) as shown below.

Pt/p-SUS:

$$[\text{surface Pt}] = [\text{geometric area of foil}] \times [\text{surface coverage}] \times [1 + Sdr] \times [\text{surface atomic density}]$$

$$= 3.0 \times 10^{-5} \text{ (m}^2\text{)} \times 1 \times 1.000 \times 1.54 \times 10^{19} \text{ atom m}^{-2} / 6.02 \times 10^{23} \text{ (atom mol}^{-1}\text{)} = 7.67 \times 10^{-4} \text{ (}\mu\text{mol)}$$

$$\text{TOF} = \frac{[\text{reaction rate}]}{[\text{surface Pt}]} = 0.205 \times 10^{-6} \text{ (mol min}^{-1}\text{)} / 7.67 \times 10^{-10} \text{ (mol)} = 267 \text{ (min}^{-1}\text{)}$$

Pt/SUS:

$$[\text{surface Pt}] = [\text{geometric area of foil}] \times [\text{surface coverage}] \times [1 + Sdr] \times [\text{surface atomic density}]$$

$$= 9.0 \times 10^{-5} \text{ (m}^2\text{)} \times 1 \times 1.011 \times 1.54 \times 10^{19} \text{ atom m}^{-2} / 6.02 \times 10^{23} \text{ (atom mol}^{-1}\text{)} = 2.33 \times 10^{-3} \text{ (}\mu\text{mol)}$$

$$\text{TOF} = \frac{[\text{reaction rate}]}{[\text{surface Pt}]} = 0.250 \times 10^{-6} \text{ (mol min}^{-1}\text{)} / 2.33 \times 10^{-9} \text{ (mol)} = 107 \text{ (min}^{-1}\text{)}$$

Pt/Al<sub>2</sub>O<sub>3</sub>/SUS:

$$[\text{surface Pt}] = [\text{geometric area of foil}] \times [\text{surface coverage}] \times [1 + Sdr] \times [\text{surface atomic density}]$$

$$= 9.0 \times 10^{-5} \text{ (m}^2\text{)} \times 1 \times 1.607 \times 1.54 \times 10^{19} \text{ atom m}^{-2} / 6.02 \times 10^{23} \text{ (atom mol}^{-1}\text{)} = 3.69 \times 10^{-3} \text{ (}\mu\text{mol)}$$

$$\text{TOF} = \frac{[\text{reaction rate}]}{[\text{surface Pt}]} = 0.083 \times 10^{-6} \text{ (mol min}^{-1}\text{)} / 3.69 \times 10^{-9} \text{ (mol)} = 22 \text{ (min}^{-1}\text{)}$$

<sup>c</sup> Determined by the CO chemisorbed at 50°C assuming the stoichiometry of CO/Pt = 1.

$$[\text{surface Pt}] = [\text{CO chemisorbed}] = 1.12 \times 10^{-2} \text{ (}\mu\text{mol)}$$

$$\text{TOF} = \frac{[\text{reaction rate}]}{[\text{surface Pt}]} = 0.083 \times 10^{-6} \text{ (mol min}^{-1}\text{)} / 1.12 \times 10^{-8} \text{ (mol)} = 7 \text{ (min}^{-1}\text{)}$$

<sup>d</sup> NH<sub>3</sub> conversion at 200°C (300 ppm NH<sub>3</sub>, 8% O<sub>2</sub>, 10% H<sub>2</sub>O, and a He balance, 100 mL min<sup>-1</sup>).

<sup>e</sup> Turnover frequency of the NH<sub>3</sub> conversion at 200°C.

## REFERENCE

1. M. Machida, Y. Tokudome, A. Maeda, Y. Kuzuhara, T. Hirakawa, T. Sato, H. Yoshida, J. Ohyama, K. Fujii and N. Ishikawa, *ACS Catal.*, 2020, **10**, 4677-4685.
2. M. Machida, Y. Tokudome, A. Maeda, T. Koide, T. Hirakawa, T. Sato, M. Tsushida, H. Yoshida, J. Ohyama, K. Fujii and N. Ishikawa, *ACS Omega*, 2020, **5**, 32814–32822.
3. M. Machida, Y. Tokudome, A. Maeda, T. Sato, H. Yoshida, J. Ohyama, K. Fujii and N. Ishikawa, *Catal. Today*, 2022, **384-386**, 70-75.
